# Supplementary material for: Non-Destructive Analytical Investigation of Decorative Wallpapers Samples of the Nineteenth Century before Their Restoration
Source: MDPI journal article supplement (doi:10.3390/s21134416), 2021-06-28
Supplement: s1 [file s1]

## Supplementary Figures

### Non-destructive analytical investigation of decorative wallpapers samples of the nineteenth century before their restoration.

Ilaria Costantini<sup>1</sup>, Kepa Castro<sup>1</sup>, Maria Dolores Rodriguez-Laso<sup>2</sup>, Juan Manuel Madariaga<sup>1</sup>, Gorka Arana<sup>1</sup>.

<sup>1</sup> Department of Analytical Chemistry, Faculty of Science and Technology, University of the Basque Country UPV/EHU, P.O. Box 644, 48080 Bilbao, Basque Country, Spain.

E-mail: [ilaria.costantini@ehu.eus](mailto:ilaria.costantini@ehu.eus)

<sup>2</sup> Department of Painting, University of the Basque Country, P.O. Box 644, 48080 Bilbao, Spain

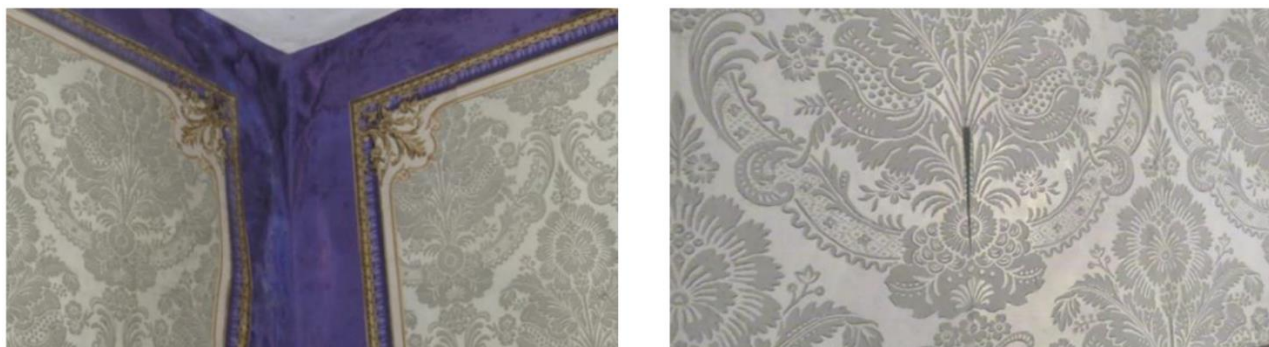

**Figure S1.** Details of wallpaper representing upholstery.

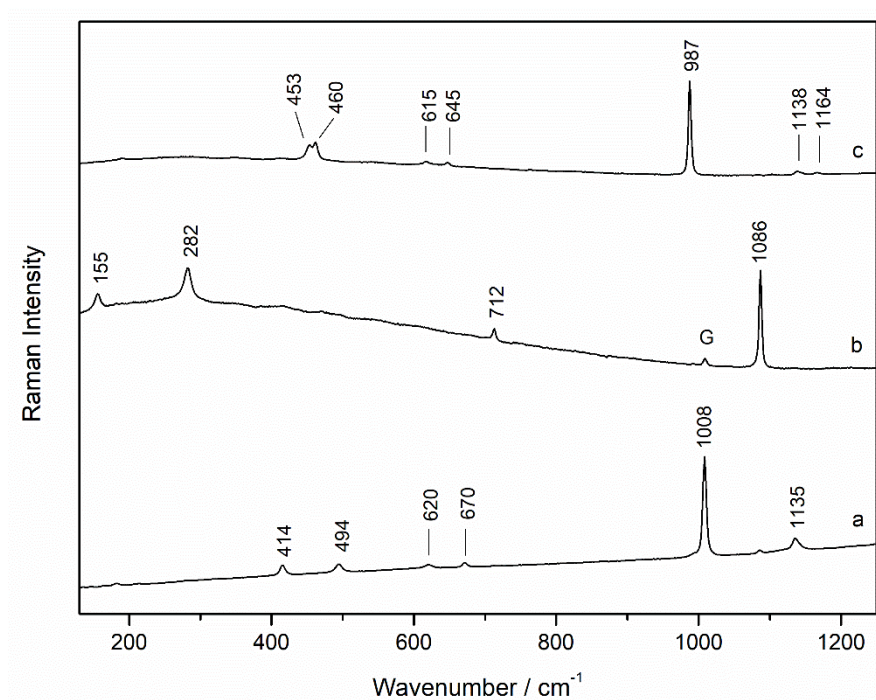

**Figure S2.** Raman spectra of (a) gypsum, (b) calcite plus gypsum (G) and (c) barium sulfate (785 nm excitation laser) from a white area (samples wp4).

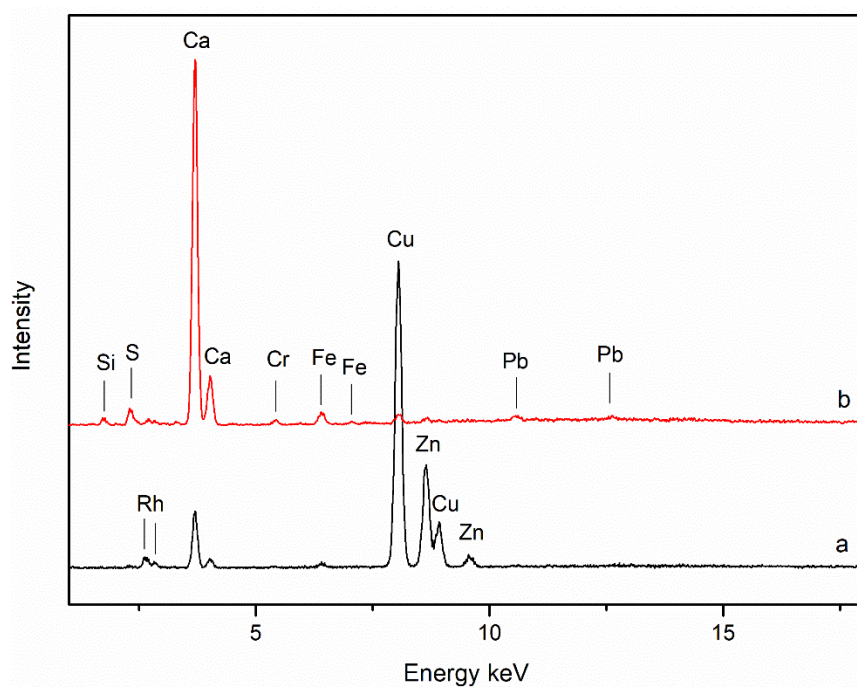

**Figure S3.** Micro-EDXRF spectra collected in a circular area (a) and in a grey area (b) (sample wp4).

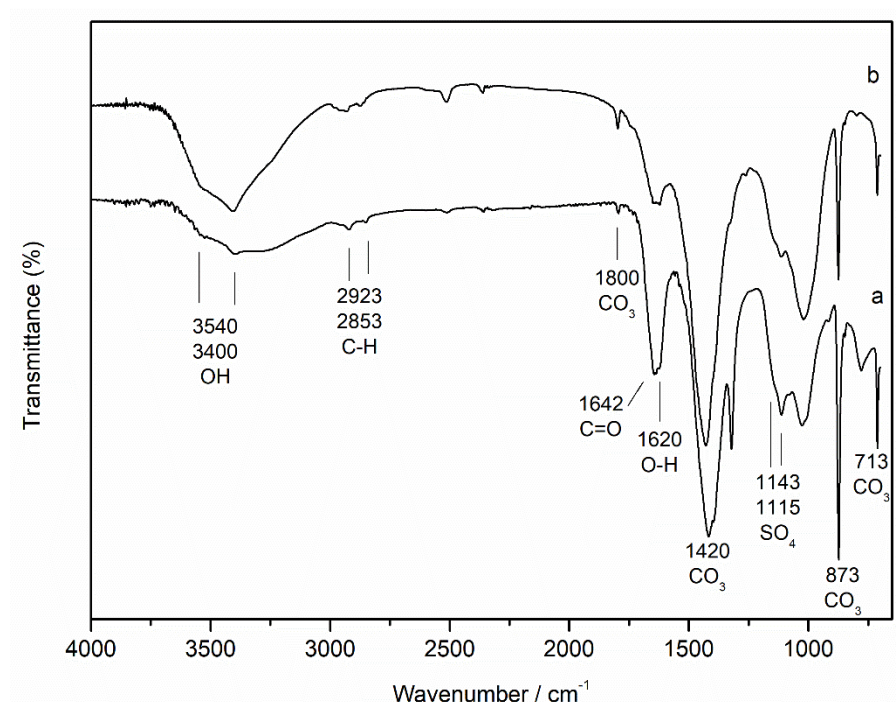

**Figure S4.** ATR-FTIR spectrum taken from the back side of decorative wallpapers (a) and from a purple area (b) (sample wp3).

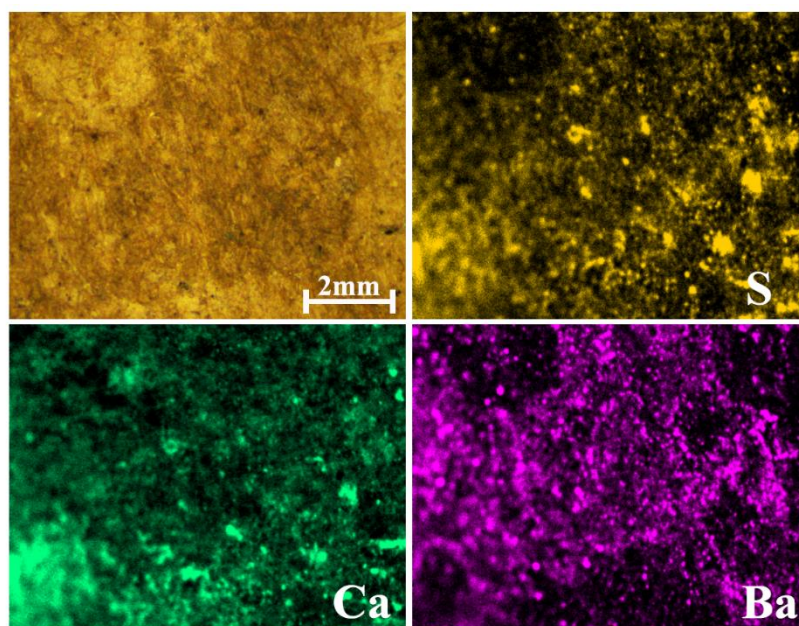

**Figure S5.** Micro-EDXRF maps from the degraded paper support (sample wp5).
